# Supplementary material for: A Requirement for Global Transcription Factor Lrp in Licensing Replication of Vibrio cholerae Chromosome 2
Source: PubMed Central journal article supplement (PMC6139311; doi:10.3389/fmicb.2018.02103), 2018-09-10
Supplement: Data_Sheet_1.pdf [file Data_Sheet_1.pdf]

## Supplementary Material

### A Requirement for Global Transcription Factor Lrp in Licensing Replication of *Vibrio cholerae* Chromosome 2

Peter N. Ciaccia<sup>1</sup>, Revathy Ramachandran<sup>1\*</sup>, Dhruba K. Chattoraj<sup>1</sup>

\* Correspondence: Revathy Ramachandran, [revathy.ramachandran@nih.gov](mailto:revathy.ramachandran@nih.gov)

#### Supplementary Figures

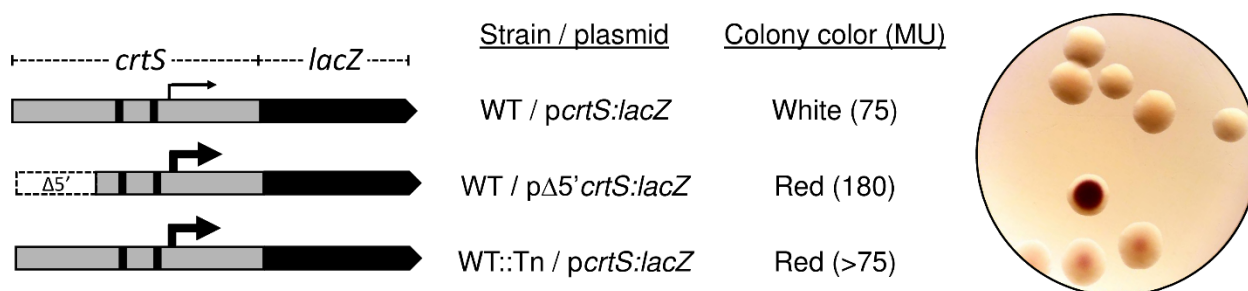

**Figure S1. A scheme for identification of factors that repress  $P_{crtS}$ .** (A) Transposon (Tn) insertional mutagenesis screen in *E. coli* DH10- $\beta$  that contained a plasmid with transcriptional-fusion of *crtS* to a promoter-less *lacZ* gene (pBJH235). The -35 and -10 elements of the promoter in *crtS*,  $P_{crtS}$ , are shown by black bars. On MacConkey agar supplemented with 3 mM PETG, the promoter activity is low enough that the cells make white colonies. When the 5' sequences of *crtS* are deleted, the colonies become red due to increased activity of  $P_{crtS}$ . Our premise is that inactivation of chromosomal genes (by transposon insertion) that are involved in repression of  $P_{crtS}$  will increase the promoter activity similar to the level seen with  $\Delta 5'$ *crtS*, and colonies of such transposon carrying cells can be recognized by their red color. The color difference is displayed here by 1:10 mixture of cells containing *crtS* vs.  $\Delta 5'$ *crtS* fused to promoter-less *lacZ* gene.  $\beta$ -galactosidase activities are in Miller units (MU).

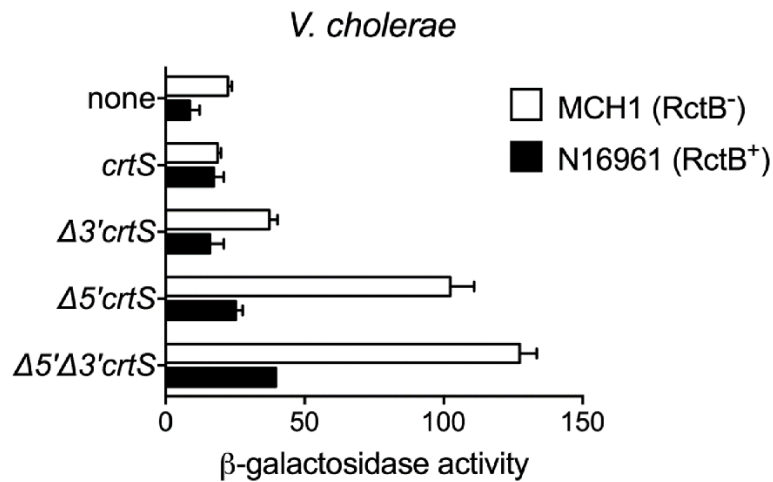

**Figure S2.  $P_{crtS}$  is repressed in *V. cholerae*.**  $\beta$ -galactosidase activity in *V. cholerae* N16961 (black columns) either containing a promoterless *lacZ* in a pBR-based plasmid (none, pMLB1109), or the same *lacZ* transcriptionally fused to either *crtS* (pBJH235),  $\Delta 3'crtS$  (pPC066),  $\Delta 5'crtS$  (pPC067) and  $\Delta 3'\Delta 5'crtS$  (pPC068). For comparison,  $\beta$ -galactosidase activities in MCH1 from Figure 2 are reused here (white columns). Note that unlike in *E. coli* and MCH1 (Figure 2), the promoter activity increases marginally upon deletion of the 5' *crtS* sequences, presumably because of the chromosomal source of RctB, which can bind and repress  $P_{crtS}$ . Data represent mean  $\pm$  SEM from three biological replicates.

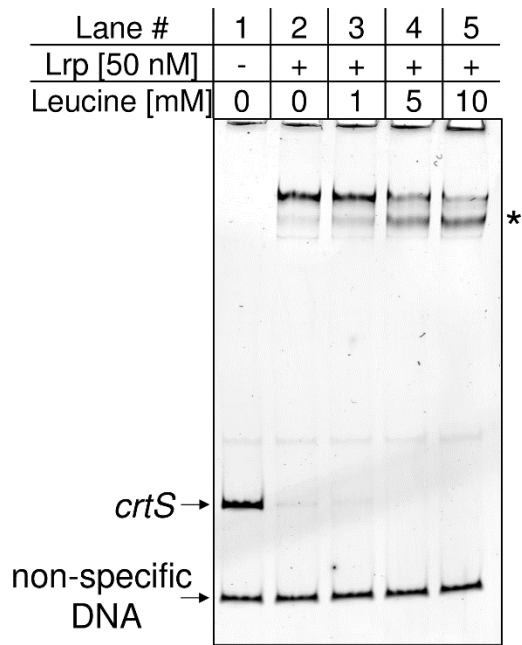

**Figure S3. Leucine alters Lrp binding to *crtS*.** EMSA of fluorescently labeled *crtS* (upper arrow) and non-specific DNA (lower arrow) with 50 nM Lrp protein in presence of increasing concentrations of leucine. With increasing leucine, the intensity of the middle-retarded band (\*) increases at the expense of the upper retarded band, indicating that the Lrp binding is responsive to leucine.

**A**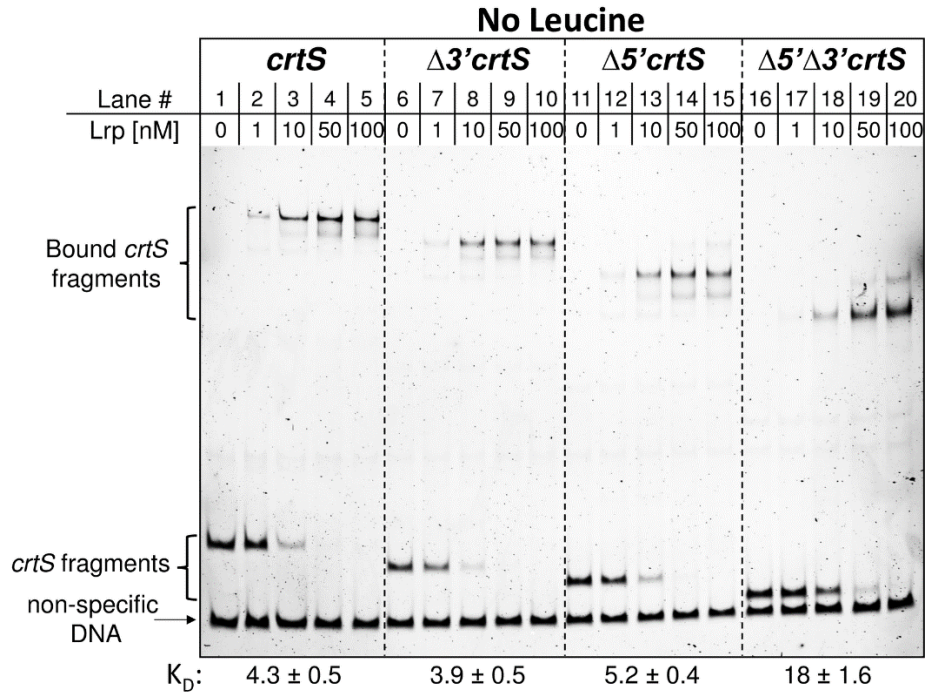**B**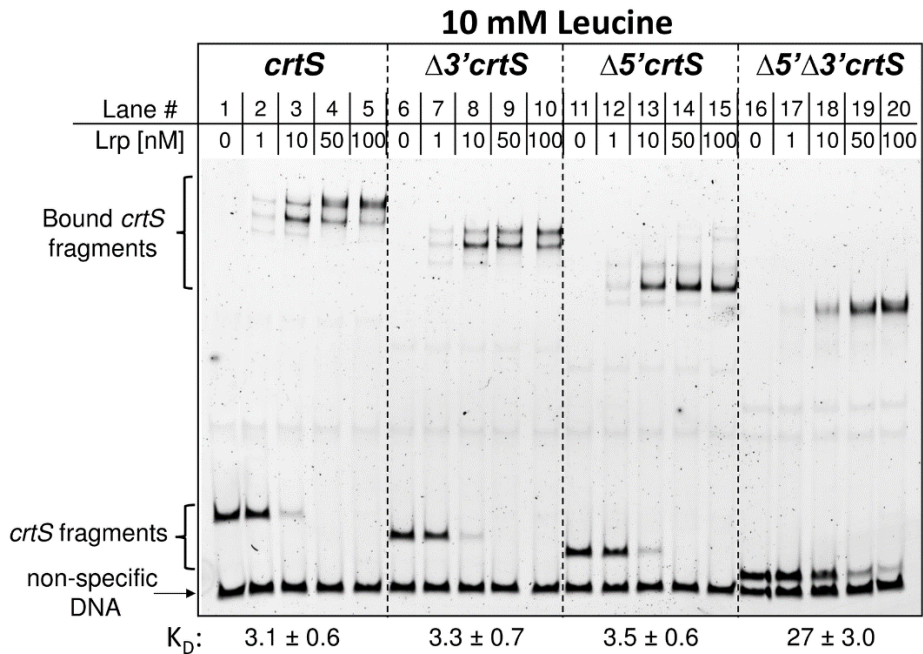

**Figure S4. Lrp binds to multiple sites on *crtS*.** (A) EMSA of fluorescently labeled *crtS*,  $\Delta 3'crtS$ ,  $\Delta 5'crtS$  and  $\Delta 5'\Delta 3'crtS$  with increasing amounts of Lrp protein. Lrp binds to all three fragments but with distinct patterns, indicating the presence of multiple binding sites within *crtS*. Apparent dissociation constant ( $K_D$ ) calculated from two trials is shown below each DNA fragment. (B) EMSA performed as described above but in the presence of 10 mM leucine. Presence of leucine did not change the fraction of the probe bound but altered the pattern of shifted species, as in Figure S3.

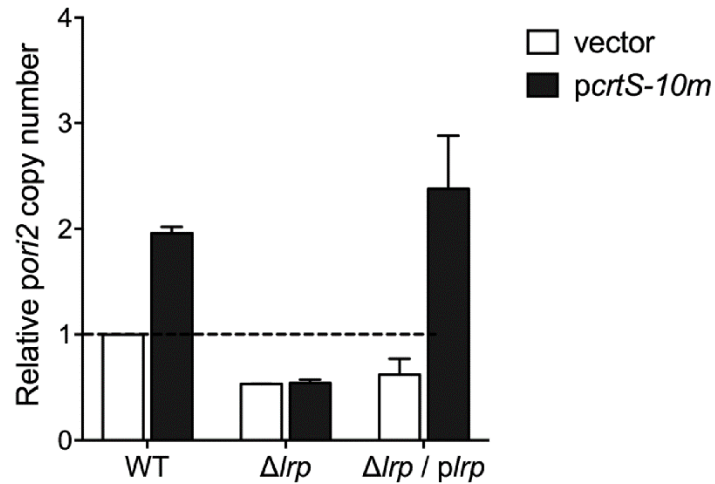

**Figure S5. Promoter repression is not the only role of Lrp in Chr2 replication.** Copy number of *porI2* in *E. coli* WT,  $\Delta lrp$ , and  $\Delta lrp/plrp$ . The cells also contained a source of RctB and additionally either a vector (white columns, pTVC243) or a plasmid containing *crtS-10m* (black columns, pBJH239), where two bases in the -10 are mutated (TATGCT to CCTGCT), that inactivates  $P_{crtS}$ . The other details are same as in Figure 4A. Note that *porI2* copy number increases two-fold in the presence of *pcrtS-10m* in WT but not in  $\Delta lrp$  cells, indicating that Lrp is required to promote Chr2 replication even when  $P_{crtS}$  is not active. Complementing  $\Delta lrp$  cells with *plrp* increases *porI2* copy number even more that that was seen in WT cells, similar to the effect seen in Figure 4A with *plrp*. Data represent mean  $\pm$  SEM from three biological replicates.

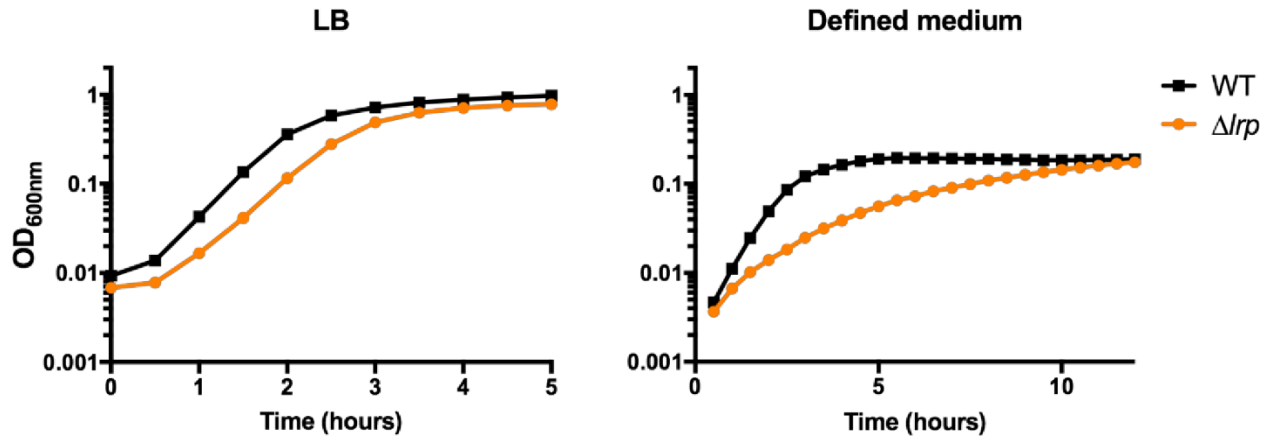

**Figure S6. *V. cholerae*  $\Delta lrp$  has less growth defect in rich medium (LB) than in a less rich defined medium used here for fluorescence microscopy.** Growth curve of *V. cholerae*  $\Delta lrp$  (orange circles, CVC3286) and WT (black squares, CVC3058) in LB or 1X M63 medium supplemented with 1 mM CaCl<sub>2</sub>, 1 mM MgSO<sub>4</sub>, 0.001% vitamin B1, 0.2% fructose and 0.1% casamino acids, showing a larger growth defect in the latter medium. Cells were grown at 37 °C in 96-well plates in a Synergy HT plate reader (Biotek). Data represents mean from two biological replicates.

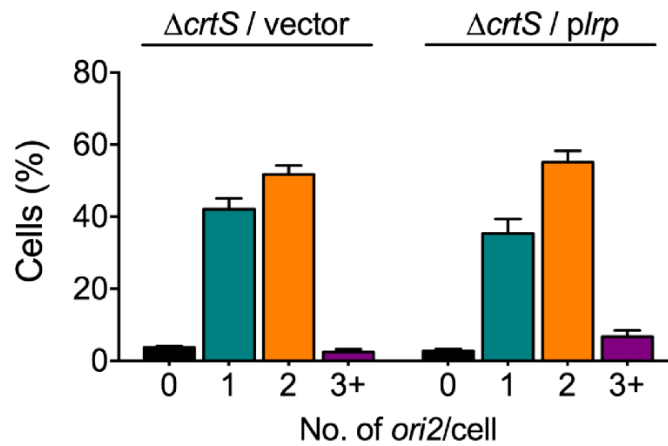

**Figure S7. Lrp functions via *crtS* in increasing Chr2 replication in *V. cholerae*.** Histograms of *ori2* foci per cell in *V. cholerae*  $\Delta crtS$  (CVC1270) with either vector (pTrc99A, left) or *plrp* (pJWD-2, right). The  $\Delta crtS$  strain contains a mutation in *rctB* that permits Chr2 replication in the absence of *crtS*. Unlike in the WT (Figure 4), increasing Lrp using *plrp* fails to increase number of *ori2* foci in the  $\Delta crtS$  strain, indicating that Lrp promotes Chr2 replication only via *crtS*. Data represent mean  $\pm$  SEM of at least 1000 cells imaged from three independent replicates.

**A**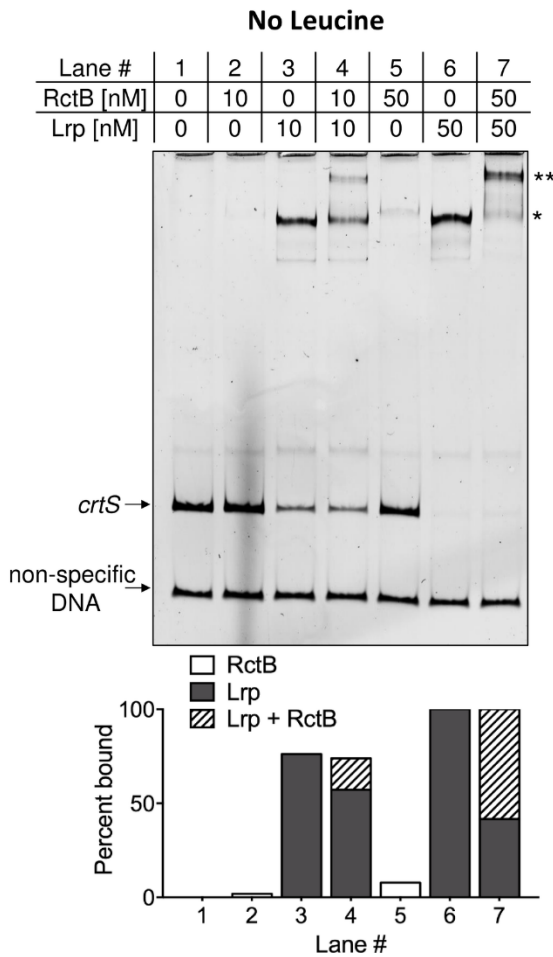**B**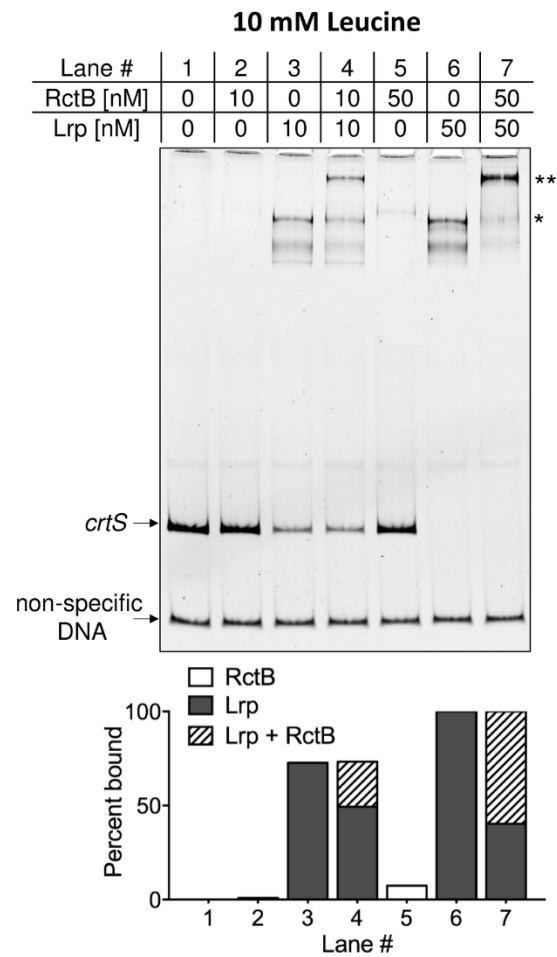

**Figure S8. Lrp-aided RctB binding to *crtS* is not affected in the presence of Leucine.** EMSA of fluorescently labeled *crtS* with Lrp, RctB or both proteins in the absence (A) or presence of 10 mM leucine (B). The Lrp-bound *crtS* is denoted by \*, and Lrp+RctB bound *crtS* is denoted by \*\*. Leucine does not affect the binding of RctB to Lrp-bound *crtS* significantly. Shown below are percentages of probe bound to RctB alone (white columns), Lrp alone (grey columns) and, both Lrp and RctB (hatched columns).



**A**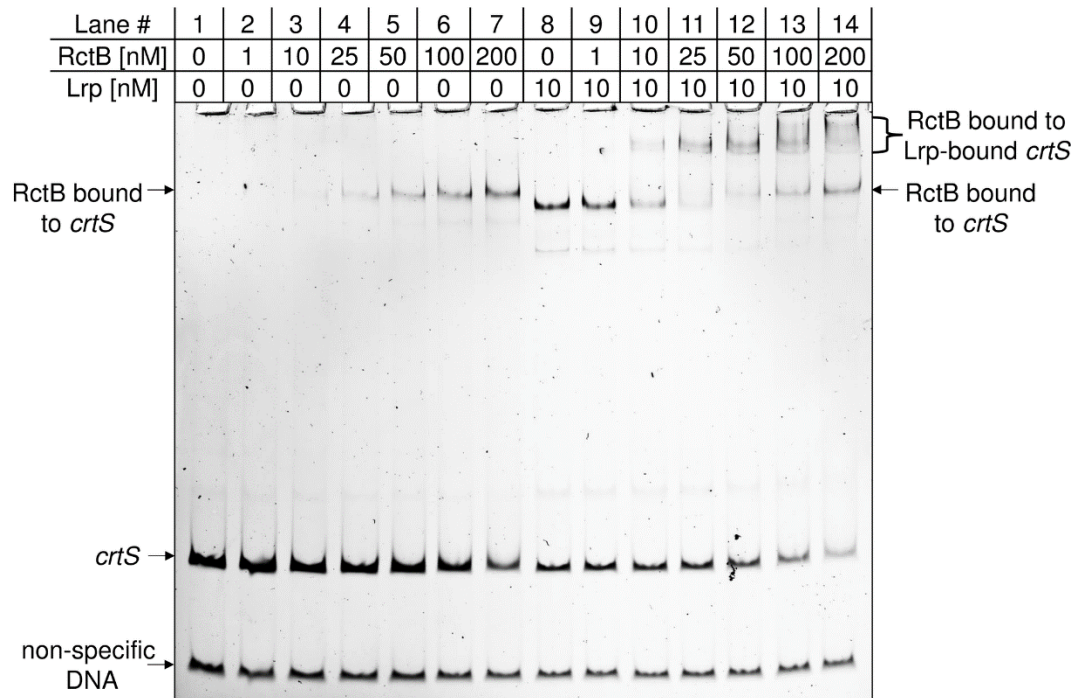**B**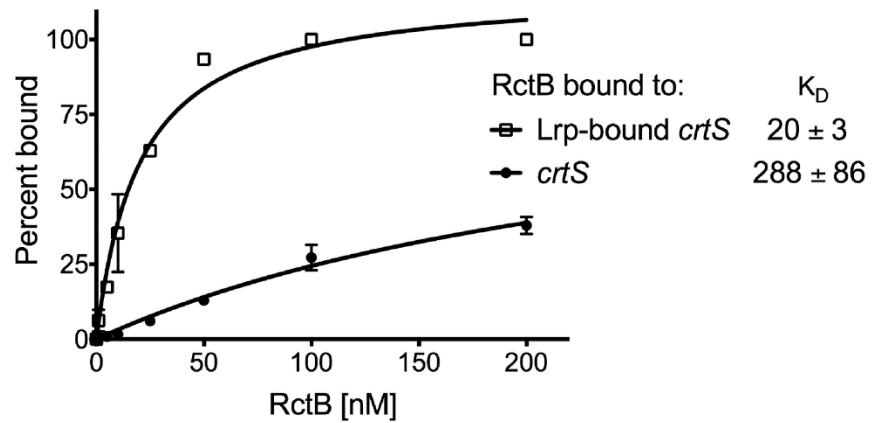

**Figure S9: RctB has higher affinity for Lrp-bound *crtS*.** (A) EMSA of fluorescently labeled *crtS* with increasing amounts of RctB in the absence (lanes 2-7) or presence of 10 nM Lrp (lanes 9-14), showing that RctB binds to Lrp-bound *crtS* in a dose-dependent manner. RctB binds to naked *crtS* once all of the Lrp-bound *crtS* is bound. (B) Quantification of percent bound probe, defined as bound/(bound + unbound), plotted against RctB concentration. The  $K_D$  of RctB binding to Lrp-bound *crtS* is lower than that to *crtS* alone. The data is collected from two gels.

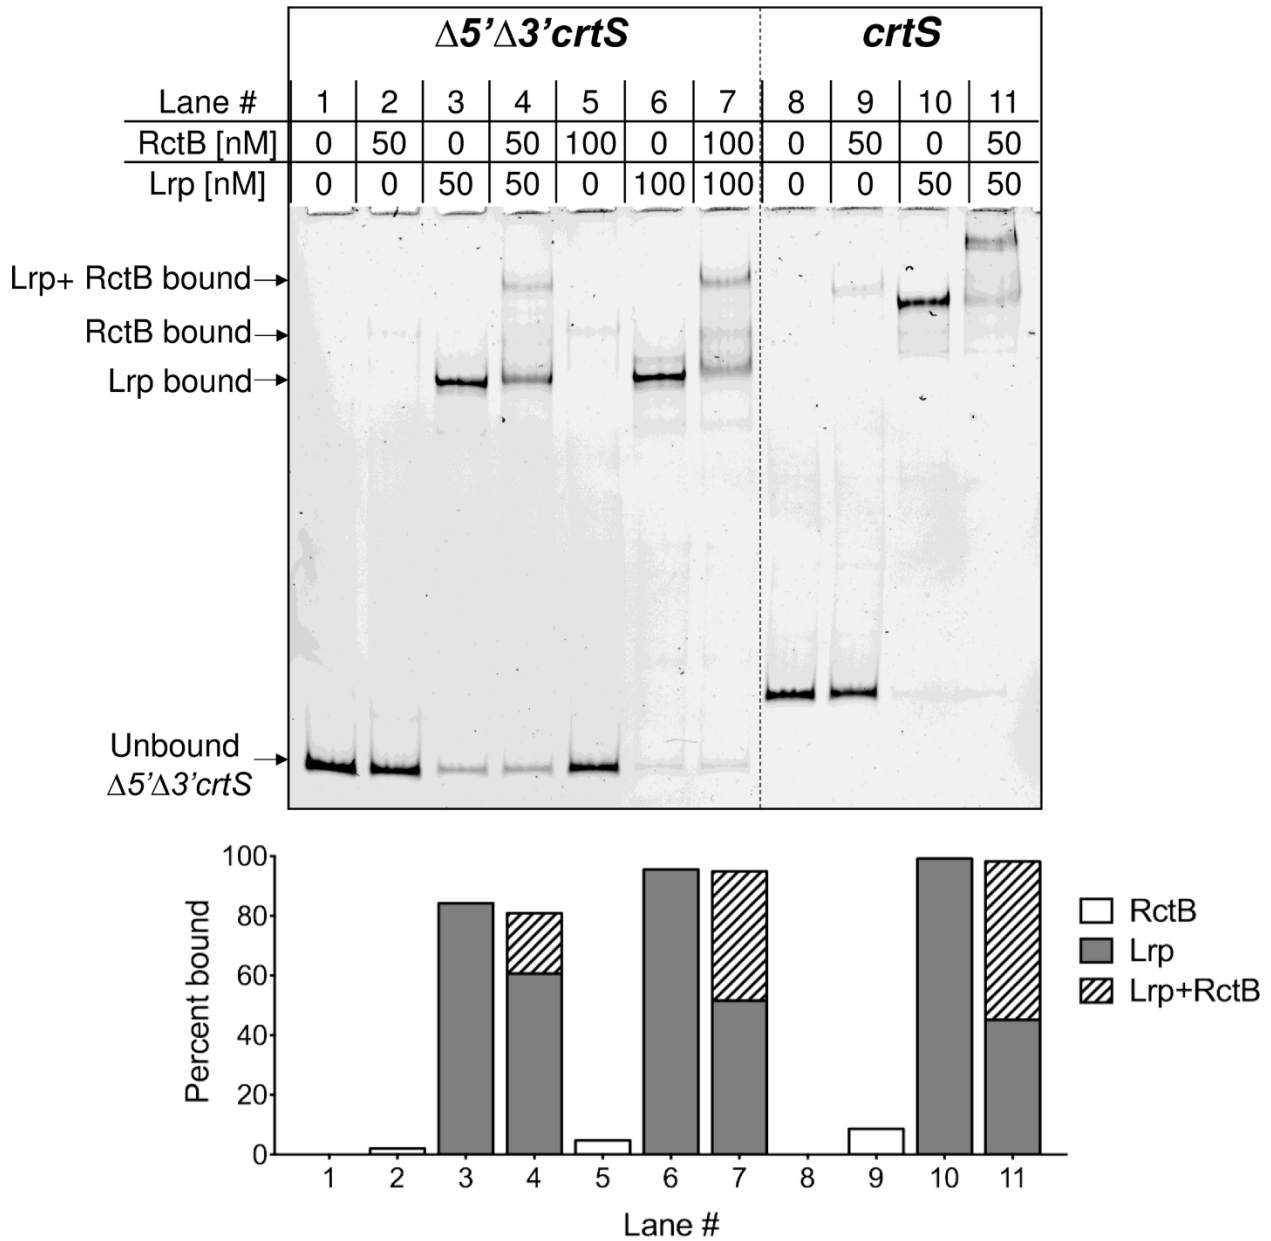

**Figure S10: Lrp aids RctB binding to  $\Delta 5' \Delta 3' crtS$ .** EMSA of fluorescently labeled  $\Delta 5' \Delta 3' crtS$  (lanes 1-7) and *crtS* (lanes 8-11) with Lrp, RctB or both proteins. Both Lrp (lanes 3, 6) and RctB (lanes 2, 5) were individually seen to bind DNA specifically, although RctB binds  $\Delta 5' \Delta 3' crtS$  weakly. The major Lrp-bound band is super-shifted in the presence of RctB for  $\Delta 5' \Delta 3' crtS$  as well as full length *crtS*. Shown below are percentages of probe bound to RctB alone (white columns), Lrp alone (grey columns) and, both Lrp and RctB (hatched columns).

## Supplementary Tables

**Table S1. Bacterial strains used in this study**

| Strain             | Genotype                                                                                                                                                                                                                                                                       | Description                                                                                              | Source                       |
|--------------------|--------------------------------------------------------------------------------------------------------------------------------------------------------------------------------------------------------------------------------------------------------------------------------|----------------------------------------------------------------------------------------------------------|------------------------------|
| <i>E. coli</i>     |                                                                                                                                                                                                                                                                                |                                                                                                          |                              |
| BL21               | <i>E. coli</i> B F <sup>-</sup> <i>ompT gal dcm lon hsdSB(r<sub>B</sub><sup>-</sup>m<sub>B</sub><sup>-</sup>) [malB<sup>+</sup>]<sub>K-12</sub>(λ<sup>S</sup>)</i>                                                                                                             |                                                                                                          | NEB, Ipswich, MA             |
| BR8706             | F <sup>-</sup> , <i>mcrA</i> , Δ( <i>mcrBC-hsdRMS-mrr</i> ), <i>recA1</i> , <i>endA1</i> , <i>lon</i> , <i>gyrA96</i> , <i>thi</i> , <i>supE44</i> , <i>relA1</i> , λ <sup>-</sup> , Δ( <i>lac-proAB</i> ), Δ( <i>araFGH</i> ), Δ <i>araEp</i> P <sub>CP18</sub> - <i>araE</i> | Stb12 with <i>araFGH</i> deleted and <i>araE</i> placed under the constitutive CP <sub>18</sub> promoter | (Fekete and Chattoraj, 2005) |
| CVC3258            | DH10-β Δ <i>lrp-787::FRT-kan-FRT</i> , Km <sup>R</sup>                                                                                                                                                                                                                         | Δ <i>lrp-787::FRT-kan-FRT</i> transduced from JW0872-2                                                   | This study                   |
| CVC3259            | DH10-β Δ <i>lrp-787</i>                                                                                                                                                                                                                                                        | <i>kan</i> excised from CVC3258 with pCP20                                                               | This study                   |
| CVC3260            | BR8706 Δ <i>lrp-787::FRT-kan-FRT</i> , Km <sup>R</sup>                                                                                                                                                                                                                         | Δ <i>lrp-787::FRT-kan-FRT</i> transduced from JW0872-2                                                   | This study                   |
| CVC3274            | BR8706 Δ <i>lrp-787</i>                                                                                                                                                                                                                                                        | <i>kan</i> excised from CVC3260 with pCP20                                                               | This study                   |
| DH10-β             | F <sup>-</sup> <i>endA1 deoR<sup>+</sup> recA1 galE15 galK16 nupG rpsL</i> Δ( <i>lac</i> )X74 φ80 <i>lacZΔM15 araD139</i> Δ( <i>ara, leu</i> )7697 <i>mcrA</i> Δ( <i>mrr-hsdRMS-mcrBC</i> ) Str <sup>R</sup> λ <sup>-</sup>                                                    |                                                                                                          | Invitrogen                   |
| JW0872-2           | F <sup>-</sup> , Δ( <i>araD-araB</i> )567, Δ <i>lacZ4787(::rrnB-3)</i> , λ <sup>-</sup> , Δ <i>lrp-787::kan, rph-1, Δ(rhaD-rhaB)</i> 568, <i>hsdR514</i> , Km <sup>R</sup>                                                                                                     | BW25113 Δ <i>lrp</i>                                                                                     | (Baba et al., 2006)          |
| <i>V. cholerae</i> |                                                                                                                                                                                                                                                                                |                                                                                                          |                              |
| CVC1121            | N16961 <i>hapR<sup>+</sup> Δdns</i> ; Str <sup>R</sup> , Gm <sup>R</sup>                                                                                                                                                                                                       | Frameshift mutation in <i>hapR</i> replaced with constitutively expressed <i>hapR</i>                    | M. Blokesch                  |
| CVC1270            | CVC1121 Δ <i>crtS P1parS kan lacZ::(araC P<sub>BAD</sub>-tus lacI<sup>q</sup> P<sub>tac</sub>-(tdTomato-pMTparB gfp-P1parB tIt2) cat) rctBR423P</i> ; Gm <sup>R</sup> , Km <sup>R</sup> , Cm <sup>R</sup>                                                                      | P1 <i>parS</i> cloned at +40 kb on Chr2 for visualizing <i>ori2</i>                                      | This study                   |
| CVC209             | <i>V. cholerae</i> El Tor N16961; Str <sup>R</sup>                                                                                                                                                                                                                             | Wild type                                                                                                | M. Waldor                    |

|         |                                                                                                                                                                                              |                                                                      |                             |
|---------|----------------------------------------------------------------------------------------------------------------------------------------------------------------------------------------------|----------------------------------------------------------------------|-----------------------------|
| CVC3058 | CVC1121 P1 <i>parS lacZ::(araC P<sub>BAD-tus lacI<sup>q</sup> P<sub>tac</sub>-(tdTomato-pMT<i>parB</i> <i>gfp</i>-P1<i>parB t1t2</i>), <i>cat</i>); Gm<sup>R</sup>, Cm<sup>R</sup></sub></i> | P1 <i>parS</i> cloned at +40 kb on Chr2 for visualizing <i>ori2</i>  | (Ramachandran et al., 2018) |
| CVC3061 | CVC3058 <i>crtS-nat</i> ; Gm <sup>R</sup> , Cm <sup>R</sup> , Nat <sup>R</sup>                                                                                                               | A second copy of <i>crtS</i> inserted 10 kb upstream of WT copy      | (Ramachandran et al., 2018) |
| CVC3226 | CVC3058 $\Delta$ <i>crtS::</i> $\Delta$ 3' <i>crtS</i> (817947-818069) <i>zeo</i> ; Cm <sup>R</sup> , Gm <sup>R</sup> , Km <sup>R</sup> , Zeo <sup>R</sup>                                   | <i>crtS</i> replaced with $\Delta$ 3' <i>crtS</i> mutant             | This study                  |
| CVC3227 | CVC3058 $\Delta$ <i>crtS::</i> $\Delta$ 5' <i>crtS</i> (818000-818099) <i>zeo</i> ; Cm <sup>R</sup> , Gm <sup>R</sup> , Km <sup>R</sup> , Zeo <sup>R</sup>                                   | <i>crtS</i> replaced with $\Delta$ 5' <i>crtS</i> mutant             | This study                  |
| CVC3228 | CVC3058 $\Delta$ <i>crtS::</i> $\Delta$ 5' $\Delta$ 3' <i>crtS</i> (818000-818069) <i>zeo</i> ; Cm <sup>R</sup> , Gm <sup>R</sup> , Km <sup>R</sup> , Zeo <sup>R</sup>                       | <i>crtS</i> replaced with $\Delta$ 5' $\Delta$ 3' <i>crtS</i> mutant | This study                  |
| CVC3286 | CVC3058 $\Delta$ <i>lrp zeo</i>                                                                                                                                                              | <i>lrp</i> replaced with zeocin resistance cassette                  | This study                  |
| MCH1    | CVC209 $\Delta$ <i>lacZ</i> $\Delta$ ( <i>parB2-rctB</i> )                                                                                                                                   | Chr1 and Chr2 fused                                                  | (Val et al., 2012)          |

**Table S2. Plasmids used in this study**

| Name                              | Description                                                                                                                                                                                | Source                               |
|-----------------------------------|--------------------------------------------------------------------------------------------------------------------------------------------------------------------------------------------|--------------------------------------|
| pACYC177                          | Vector; p15Aori; Ap <sup>R</sup> , Km <sup>R</sup>                                                                                                                                         | NEB, Ipswich, MA                     |
| pBJH170                           | pTVC243 <i>crtS</i> (817947-818099); Cm <sup>R</sup>                                                                                                                                       | (Baek and Chatteraj, 2014)           |
| pBJH188                           | pACYC177 $\Delta$ <i>bla crtS</i> (817947-818099); p15Aori; Km <sup>R</sup>                                                                                                                | (Baek and Chatteraj, 2014)           |
| pBJH235                           | pMLB1109 <i>crtS</i> (817947-818099); Ap <sup>R</sup>                                                                                                                                      | (Baek and Chatteraj, 2014)           |
| pBJH245                           | 1 kb homology upstream and downstream of <i>crtS</i> with <i>zeo</i> in place of <i>crtS</i> ; pBRori; Zeo <sup>R</sup> , Ap <sup>R</sup>                                                  | (Baek and Chatteraj, 2014)           |
| pCP20                             | Source of Flp recombinase; Ap <sup>R</sup> , Cm <sup>R</sup>                                                                                                                               | (Datsenko and Wanner, 2000)          |
| pEM7-Zeo                          | Cloning vector and source of <i>zeo</i> cassette; pBRori; Ap <sup>R</sup> , Zeo <sup>R</sup>                                                                                               | Invitrogen                           |
| pJWD-2                            | Source of <i>Lrp</i> ; Ap <sup>R</sup>                                                                                                                                                     | (Ernsting et al., 1993)              |
| pMLB1109                          | Source of promoterless <i>lacZ</i> gene; Ap <sup>R</sup>                                                                                                                                   | M. Berman                            |
| pMT101:: <i>recA</i> <sup>+</sup> | <i>recA</i> cloned in pSC101 <i>rep(ts)</i> ; Cm <sup>R</sup> , <i>ts</i>                                                                                                                  | G. Weinstock                         |
| pPC020                            | pACYC177 $\Delta$ <i>bla</i> ; p15Aori; Km <sup>R</sup>                                                                                                                                    | This work                            |
| pPC066                            | pMLB1109 $\Delta$ 3' <i>crtS</i> (817947-818069); Ap <sup>R</sup>                                                                                                                          | This work                            |
| pPC067                            | pMLB1109 $\Delta$ 5' <i>crtS</i> (818000-818099); Ap <sup>R</sup>                                                                                                                          | This work                            |
| pPC068                            | pMLB1109 $\Delta$ 5' $\Delta$ 3' <i>crtS</i> (818000-818069); Ap <sup>R</sup>                                                                                                              | This work                            |
| pPC143                            | pBJH245 with $\Delta$ 3' <i>crtS</i> (817947-818069) inserted between flanks; Ap <sup>R</sup> , Zeo <sup>R</sup>                                                                           | This work                            |
| pPC144                            | pBJH245 with $\Delta$ 5' <i>crtS</i> (818000-818099) inserted between flanks; Ap <sup>R</sup> , Zeo <sup>R</sup>                                                                           | This work                            |
| pPC145                            | pBJH245 with $\Delta$ 5' $\Delta$ 3' <i>crtS</i> (818000-818069) inserted between flanks; Ap <sup>R</sup> , Zeo <sup>R</sup>                                                               | This work                            |
| pPC352                            | Upstream flank of <i>lrp</i> (2053847-2054879) and downstream flank of <i>lrp</i> (2056384-2055375) cloned into pEM7-Zeo on either side of <i>zeo</i> ; Ap <sup>R</sup> , Zeo <sup>R</sup> | This work                            |
| pPC401                            | <i>P<sub>trc</sub></i> and <i>lrp</i> from pJWD-2 cloned into pACYC177; Km <sup>R</sup>                                                                                                    | This work                            |
| pRR24                             | <i>RctB</i> source in which <i>rctB</i> is transcriptionally fused to <i>kan</i> in pACYC177; p15Aori; Km <sup>R</sup>                                                                     | (Ramachandran et al., 2018)          |
| pTrc99a                           | Vector; pBRori; Ap <sup>R</sup>                                                                                                                                                            | H. Bernstein                         |
| pTVC11                            | <i>P<sub>BAD-rctB</sub></i> in pGB2; pSC101ori; Sp <sup>R</sup>                                                                                                                            | (Pal et al., 2005)                   |
| pTVC22                            | <i>ori2</i> (253-1133) in R6Kori $\gamma$ , Ap <sup>R</sup>                                                                                                                                | (Venkova-Canova et al., 2006)        |
| pTVC243                           | Vector; pBR322ori; Cm <sup>R</sup>                                                                                                                                                         | (Venkova-Canova and Chatteraj, 2011) |

**Table S3. Primers used in this study**

| Name   | Sequence                                                               | Used for amplifying                                                                             |
|--------|------------------------------------------------------------------------|-------------------------------------------------------------------------------------------------|
| PNC046 | TATAGTGAAAAGATCACTCTAG<br>AGGATCCCCGGGAA                               | pBJH245 backbone to construct pPC143                                                            |
| PNC047 | TTCCCGGGGATCCTCTAGAGTG<br>ATCTTTTCACTATA                               | $\Delta 3'crtS$ from pBJH188 to construct pPC143                                                |
| PNC050 | CATTTCAATTTTAAAAAGAATA<br>AAAAGTAGAGGATCCCCGGGA                        | pBJH245 backbone to construct pPC144 and pPC145                                                 |
| PNC051 | TCCCGGGGATCCTCTAGTTTTT<br>ATTCTTTTTTAAAATTGAAATG                       | $\Delta 5'crtS$ and $\Delta 5'\Delta 3'crtS$ from pBJH188 to construct pPC144 and pPC145        |
| PNC053 | AGATCGCTGATCAAAACCTTTT<br>GAGCAGAAGATCCGG                              | pBJH245 backbone to construct pPC144                                                            |
| PNC054 | GGTGGGTGGTTATATAAAAGTT<br>TTTGAGCAGAAGATCCGG                           | pBJH245 backbone to construct pPC143 and pPC145                                                 |
| PNC055 | CCGGATCTTCTGCTCAAAAGGT<br>TTTGATCAGCGATCT                              | $\Delta 5'crtS$ from pBJH188 to construct pPC144                                                |
| PNC056 | CCGGATCTTCTGCTCAAAAAGT<br>TTTATATAACCACCCACC                           | $\Delta 3'crtS$ and $\Delta 5'\Delta 3'crtS$ from pBJH188 to construct pPC143 and pPC145        |
| PNC077 | /56FAM/TTGAAGACGAAAGGGC<br>CTC                                         | DNA probes for EMSA from pACY177-based plasmids                                                 |
| PNC078 | /56FAM/CCGCCTCCATCCAGTC                                                |                                                                                                 |
| PNC121 | CGATTAAGTTGGGTAGCTCTGG<br>TTTCAACTCGACTTTAGGCTCC<br>ACTTG              | 1kb downstream flanking region of <i>lrp</i> from genomic DNA of CVC1121 to construct pPC352    |
| PNC122 | GCCGAGGAGCAGGACCTTAAA<br>GCGAATGTTGGAGATCTTTCCA<br>CATTCTGAC           |                                                                                                 |
| PNC123 | AGGCCAGCAAAAGGTTTTTATT<br>CCACCTTATTACTTCCTTGCAA<br>AAAATATACTACAACCTC | 1kb upstream flanking region of <i>lrp</i> from genomic DNA of CVC1121 to construct pPC352      |
| PNC124 | CAGCAACGCGGCTCTGCGTGAG<br>TGGTAGGGTGAGAGGTTTC                          |                                                                                                 |
| PNC125 | AGTTGAAACCAGAGCTACCCAA<br>CTTAATCGCCTTGACGACATC                        | <i>bla</i> and pBR322ori in pEM7- <i>zeo</i> to construct pPC352                                |
| PNC126 | TACCACTCACGCAGAGCCGCGT<br>TGCTGGCGTTTTTCC                              |                                                                                                 |
| PNC127 | AGGTGGAATAAAAACCTTTTGC<br>TGGCCTTTTGCTCACATGCTG                        | EM7 promoter and <i>zeo</i> gene in pEM7- <i>zeo</i> to construct pPC352                        |
| PNC128 | CATTCGCTTTAAGGTCCTGCTC<br>CTCGGCCACGAAGTG                              |                                                                                                 |
| PNC131 | GCTCTGGTTTCAACTCGACTTT<br>AGGCTCCACTTG                                 | Upstream flank, P <sub>EM7-<i>zeo</i></sub> , downstream flank from pPC352 to construct CVC3286 |
| PNC132 | TCTGCGTGAGTGGTAGGGTGAG<br>AGGTTTC                                      |                                                                                                 |

|        |                                                           |                                                                                                                                                                     |
|--------|-----------------------------------------------------------|---------------------------------------------------------------------------------------------------------------------------------------------------------------------|
| PNC139 | GAACGTCGTGCGCTCACATGTT<br>CTTTCCTGCGTTATCCCCTGATT<br>CTG  | <i>lacI<sup>q</sup></i> , <i>P<sub>trcIrp</sub></i> from pJWD-2 to construct<br>pPC401                                                                              |
| PNC140 | TCTCAGCGATCTGTCTTAGCGC<br>GTCTTAATAACCAGACGATTAC<br>TCTGC |                                                                                                                                                                     |
| PNC141 | AGACGCGCTAAGACAGATCGCT<br>GAGATAGGTGCCTCACTG              | pACYC177 backbone to construct pPC401                                                                                                                               |
| PNC142 | ATGTGAGCGCACGACGTTCCCTG<br>TCCACGGTACGC                   |                                                                                                                                                                     |
| RR160  | ATGAGCATGGTGAAAAACCGC                                     | Upstream flank, <i>P<sub>EM7-zeo</sub></i> , and downstream<br>flank from pPC143, pPC144, and pPC145<br>to construct CVC3226, CVC3227, and<br>CVC3228, respectively |
| RR162  | GGAATTGGTCAGCCGTGATCAT                                    |                                                                                                                                                                     |
| RR202  | /56FAM/ATCCGATTACGGCACC<br>AAATCGA                        | DNA probes for EMSA from pTVC243-<br>based plasmids                                                                                                                 |
| RR214  | /56FAM/AACGTGGATAAACTTC<br>CTGTAAT                        |                                                                                                                                                                     |

**Table S4: Predicted paralogs of Lrp in *V. cholerae***

| <b>Lrp<br/>paralog</b> | <b>Accession number</b> | <b>Gene ID</b> | <b>% identity</b> | <b>Alignment<br/>length</b> | <b>e-value</b> |
|------------------------|-------------------------|----------------|-------------------|-----------------------------|----------------|
| Lrp                    | NP_231538.1             | VC1904         | 100               | 164                         | 2.94E-120      |
| #1                     | NP_233450.1             | VCA1068        | 45.517            | 145                         | 2.88E-41       |
| #2                     | NP_231349.1             | VC1713         | 40.816            | 147                         | 6.67E-33       |
| #3                     | NP_230707.2             | VC1062         | 35.135            | 148                         | 1.32E-30       |
| #4<br>(AsnC)           | NP_229730.1             | VC0071         | 24.828            | 145                         | 1.94E-11       |



## Supplementary References

- Baba, T., Ara, T., Hasegawa, M., Takai, Y., Okumura, Y., Baba, M., Datsenko, K.A., Tomita, M., Wanner, B.L., and Mori, H. (2006). Construction of *Escherichia coli* K-12 in-frame, single-gene knockout mutants: the Keio collection. *Mol Syst Biol* 2, 2006 0008.
- Baek, J.H., and Chattoraj, D.K. (2014). Chromosome I Controls Chromosome II Replication in *Vibrio cholerae*. *PLoS Genet* 10, e1004184.
- Datsenko, K.A., and Wanner, B.L. (2000). One-step inactivation of chromosomal genes in *Escherichia coli* K-12 using PCR products. *Proc Natl Acad Sci U S A* 97, 6640-6645.
- Ernsting, B.R., Denninger, J.W., Blumenthal, R.M., and Matthews, R.G. (1993). Regulation of the *gltBDF* operon of *Escherichia coli*: how is a leucine-insensitive operon regulated by the leucine-responsive regulatory protein? *J Bacteriol* 175, 7160-7169.
- Fekete, R.A., and Chattoraj, D.K. (2005). A cis-acting sequence involved in chromosome segregation in *Escherichia coli*. *Mol Microbiol* 55, 175-183.
- Pal, D., Venkova-Canova, T., Srivastava, P., and Chattoraj, D.K. (2005). Multipartite regulation of *rctB*, the replication initiator gene of *Vibrio cholerae* chromosome II. *J Bacteriol* 187, 7167-7175.
- Ramachandran, R., Ciaccia, P.N., Filsuf, T.A., Jha, J.K., and Chattoraj, D.K. (2018). Chromosome 1 licenses chromosome 2 replication in *Vibrio cholerae* by doubling the *crtS* gene dosage. *PLoS Genet* 14, e1007426.
- Val, M.E., Skovgaard, O., Ducos-Galand, M., Bland, M.J., and Mazel, D. (2012). Genome Engineering in *Vibrio cholerae*: A Feasible Approach to Address Biological Issues. *PLoS Genet* 8, e1002472.
- Venkova-Canova, T., and Chattoraj, D.K. (2011). Transition from a plasmid to a chromosomal mode of replication entails additional regulators. *Proc Natl Acad Sci U S A* 108, 6199-6204.
- Venkova-Canova, T., Srivastava, P., and Chattoraj, D.K. (2006). Transcriptional inactivation of a regulatory site for replication of *Vibrio cholerae* chromosome II. *Proc Natl Acad Sci U S A* 103, 12051-12056.
